# Supplementary material for: Studies on structural defects in bare, PVP capped and TPPO capped copper oxide nanoparticles by positron annihilation lifetime spectroscopy and their impact on photocatalytic degradation of rhodamine B
Source: Royal Society of Chemistry journal article supplement (doi:10.1039/c6ra12795a), 2016-01-01
Supplement: c6ra12795a1.pdf [file c6ra12795a1.pdf]

## SUPPLEMENTARY INFORMATION

### **Studies on structural defects in bare, PVP capped and TPPO capped copper oxide nanoparticles by positron annihilation lifetime spectroscopy and its impact on photocatalytic degradation of Rhodamine B**

Aarti Sharma<sup>1</sup>, Raj Kumar Dutta<sup>1,2\*</sup>, Anirban Roychowdhury<sup>3</sup>, Dipankar Das<sup>3</sup>

<sup>1</sup>*Centre of Nanotechnology, Indian Institute of Technology Roorkee, Roorkee 247667, India*

<sup>2</sup>*Department of Chemistry, Indian Institute of Technology Roorkee, Roorkee 247667, India*

<sup>3</sup>*UGC-DAE Consortium for Scientific Research, Kolkata Centre, III/LB-8, Bidhannagar, Kolkata-700098, India*

\*Corresponding author: Fax: +91-1332-286202, Tel. +91-1332-285280, Email:

duttafcy@iitr.ernet.in

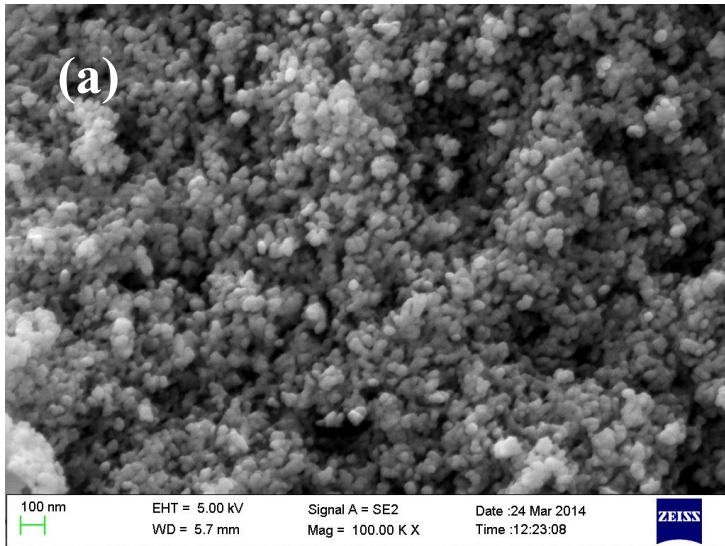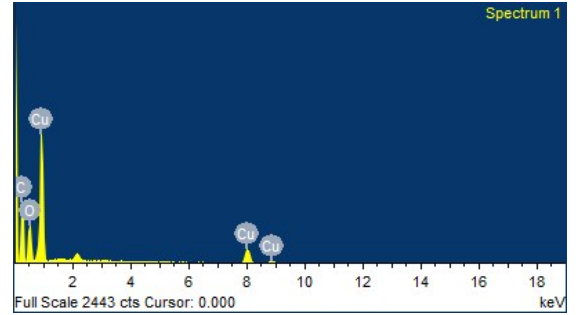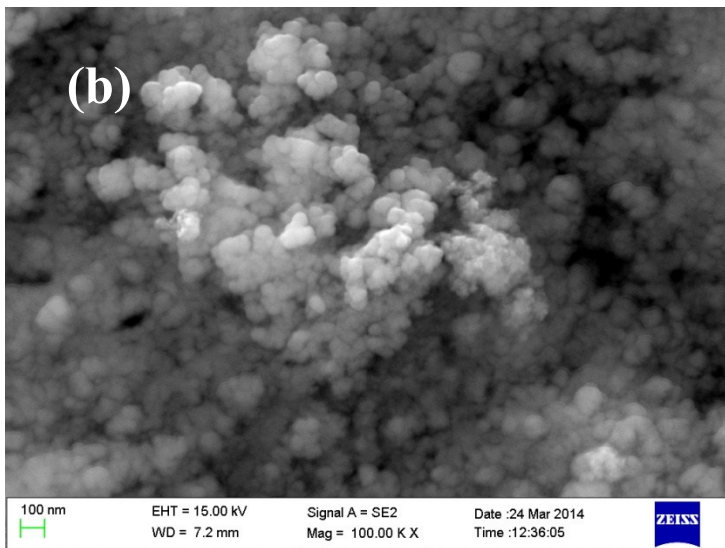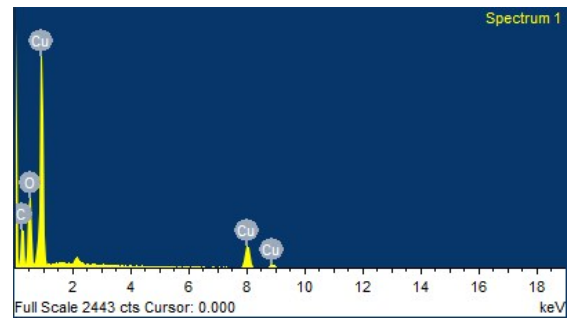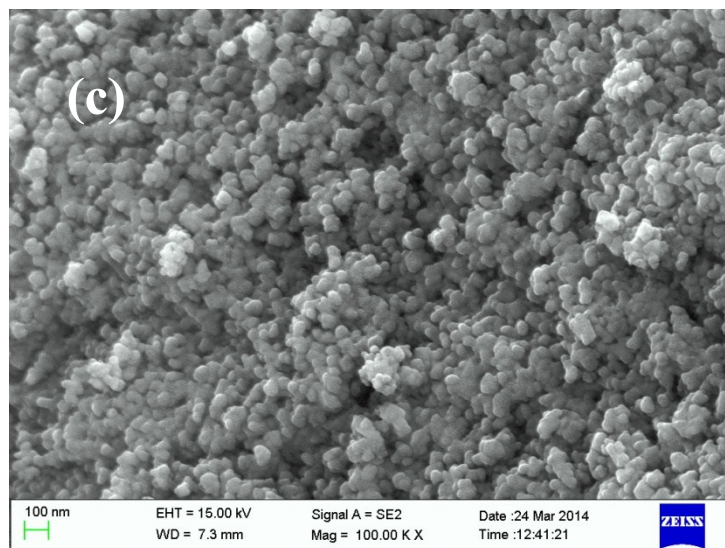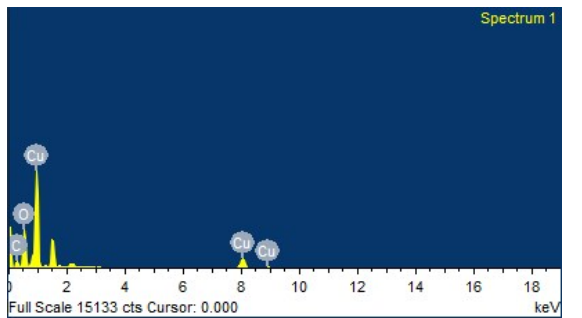

Fig. S1

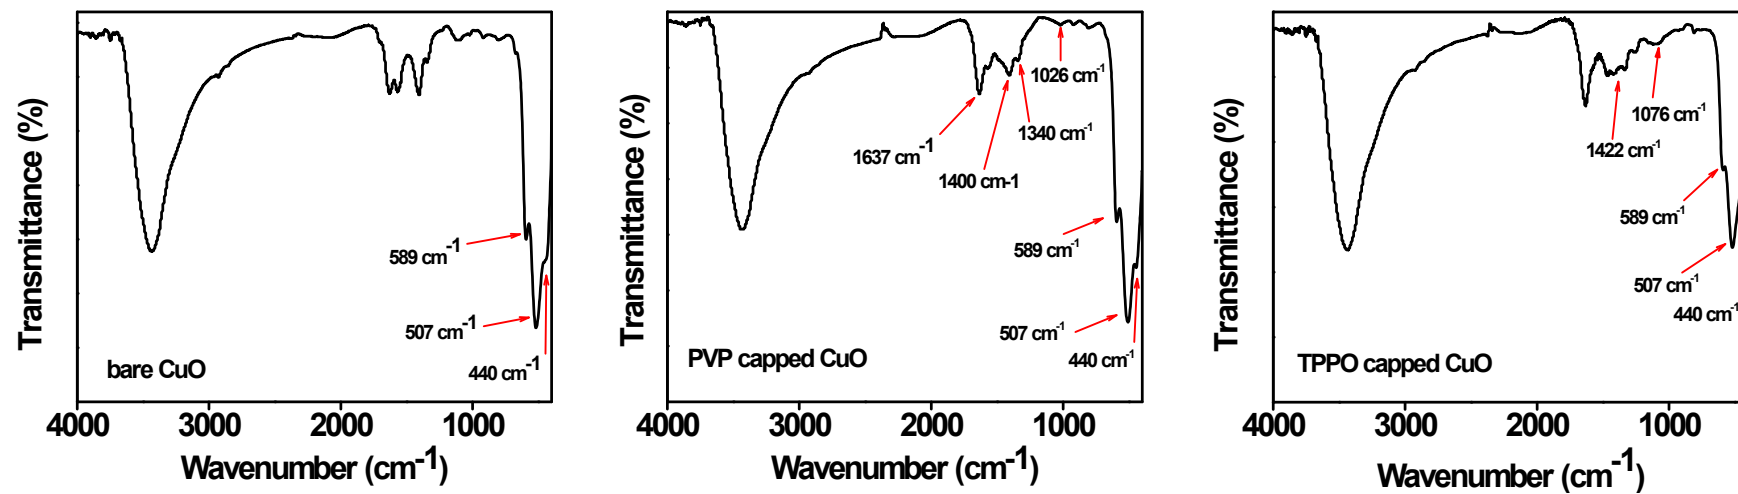

Fig. S2

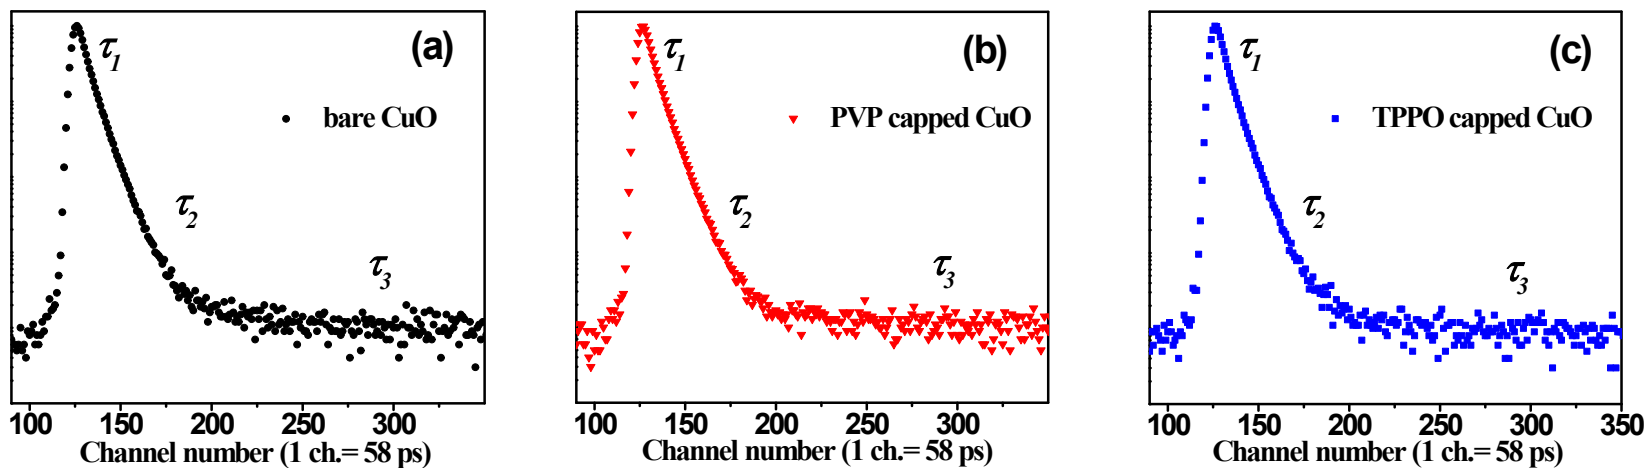

Fig. S3

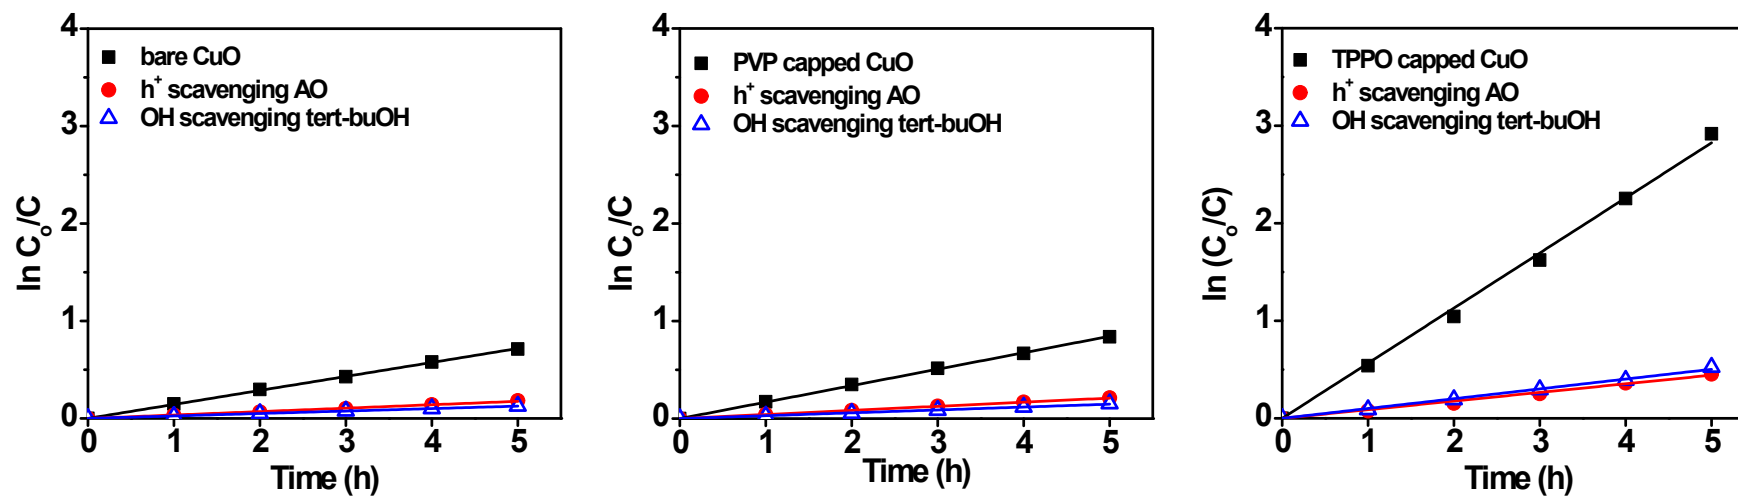

Fig. S4

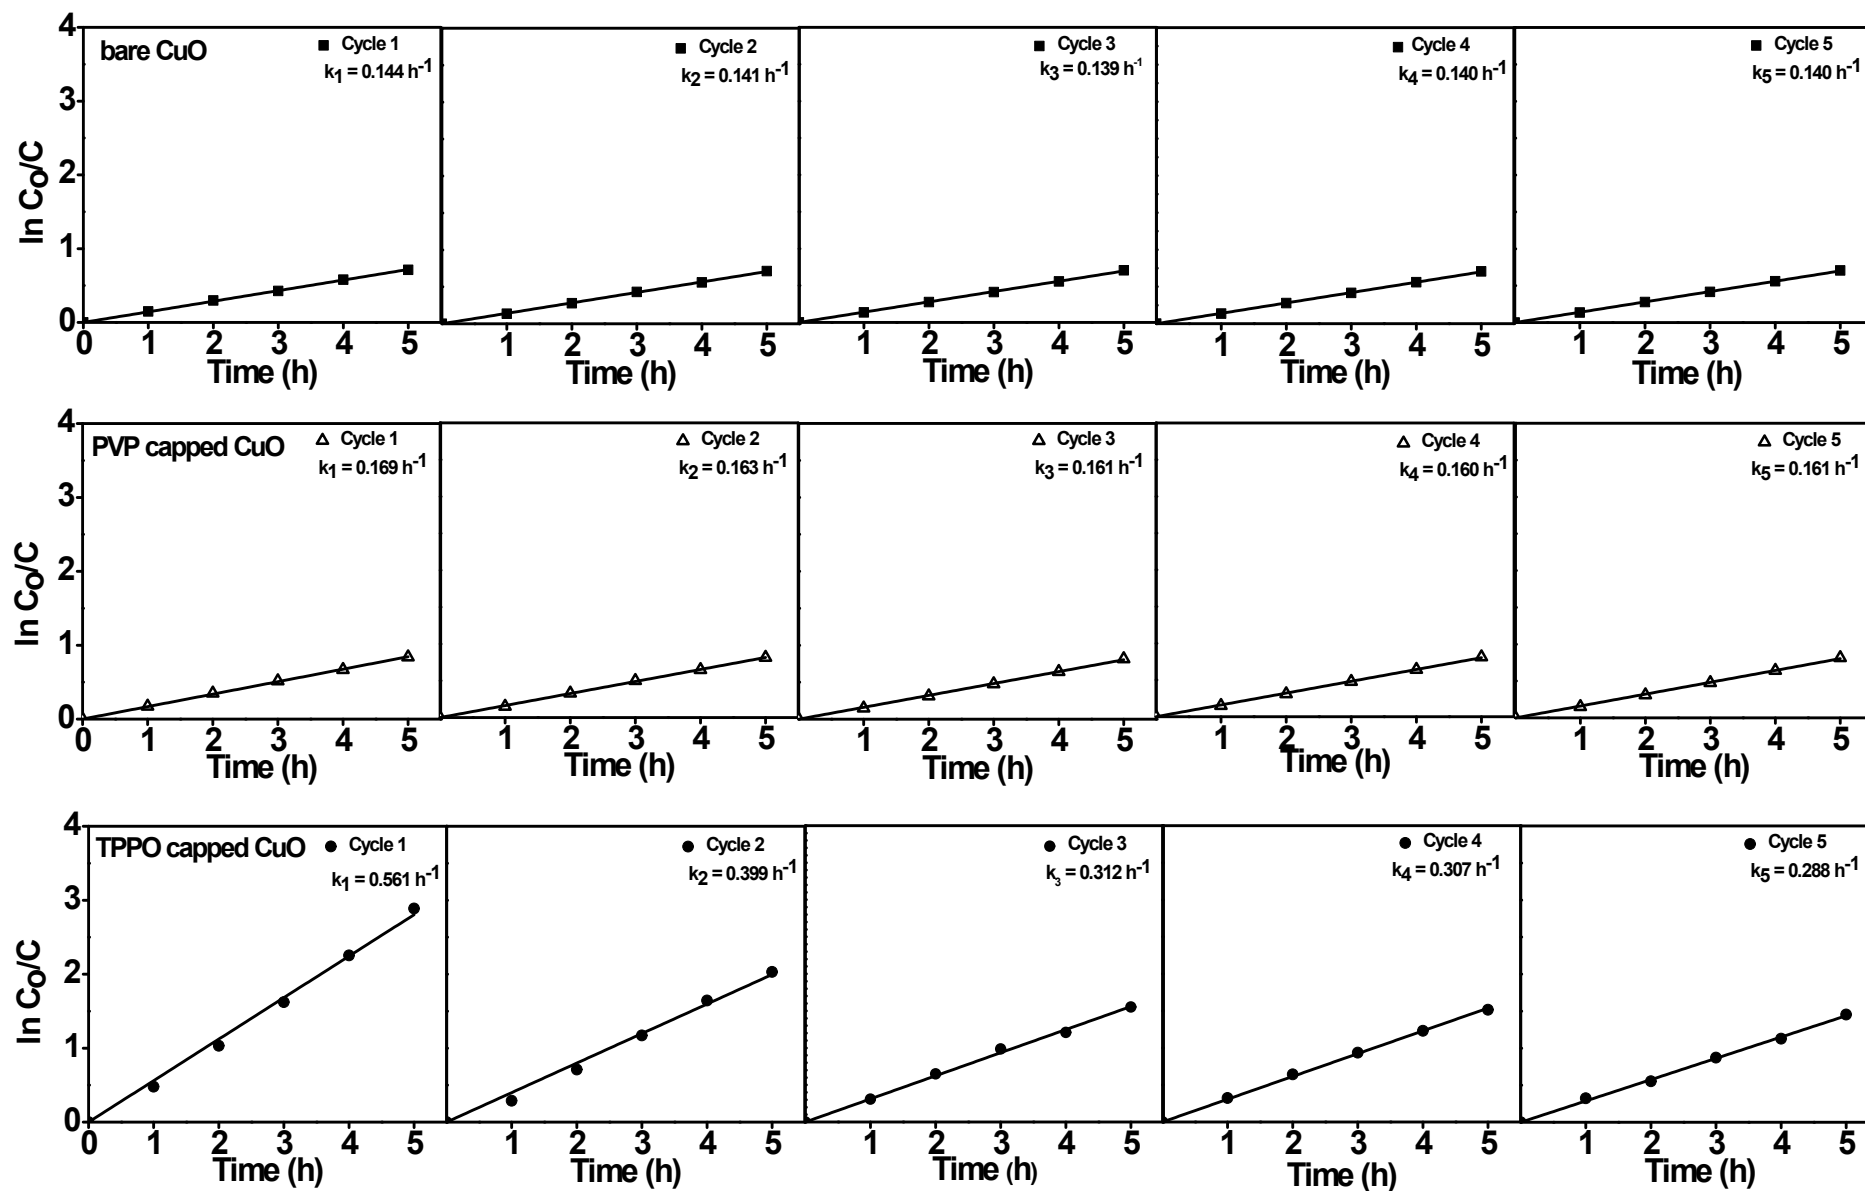

Fig S5

**FIGURE CAPTION for Supporting Figures**

- S1. FE-SEM images and EDX spectrum of (a) bare CuO (b) PVP capped CuO (c) TPPO capped CuO NPs
- S2. FTIR spectra of bare CuO, PVP capped CuO and TPPO capped CuO NPs
- S3. Positron lifetime spectra of (b) bare CuO (c) PVP capped CuO (d) TPPO capped CuO NPs.
- S4. Effects of different scavengers on the degradation of RhB by bare, PVP and TPPO capped CuO NPs
- S5. Kinetic studies of RhB dye degradation for five successive cycles with bare, PVP and TPPO capped CuO NPs
